# Supplementary material for: Dual quinoline-hybrid compounds with antimalarial activity against Plasmodium falciparum parasites
Source: Royal Society of Chemistry journal article supplement (doi:10.1039/d1nj05598d), 2022-01-01

## Dual Quinoline-Hybrid Compounds with Antimalarial Activity Against *Plasmodium falciparum* Parasites

Geraldo José da Silva Neto,<sup>1</sup> Leandro Rocha Silva,<sup>2</sup> Rafael Jorge Melo de Omena,<sup>1</sup> Anna Caroline Campos Aguiar,<sup>3</sup> Yasmin Annunciato,<sup>3</sup> Bárbara Rosseto,<sup>3</sup> Marcos Gazarine,<sup>3</sup> Luana Heimfarth,<sup>4</sup> Lucindo José Quintans-Júnior,<sup>4</sup> Edeildo Ferreira da Silva-Júnior,<sup>2,\*</sup> and Mario Roberto Meneghetti <sup>1,\*</sup>

<sup>1</sup> Group of Catalysis and Chemical Reactivity, Institute of Chemistry and Biotechnology, Federal University of Alagoas, Av. Lourival Melo Mota, 57072-900, Maceió, Brazil.

<sup>2</sup> Institute of Chemistry and Biotechnology, Federal University of Alagoas, Av. Lourival Melo Mota, 57072-900, Maceió, Brazil.

<sup>3</sup> Department of Bioscience, Federal University of São Paulo, Central Building - Silva Jardim Street, 136 - Vila Matias, 11015-020, Santos, Brazil.

<sup>4</sup> Department of Physiology, Federal University of Sergipe, São Cristóvão, Sergipe, Brazil

\*Corresponding authors: Meneghetti, MR. Tel.: +55-82-3214-1744; email: [mrm@qui.ufal.br](mailto:mrm@qui.ufal.br); and da Silva-Júnior, EF. Tel.: +55-87-99610-8311; email: [edeildo.junior@iqb.ufal.br](mailto:edeildo.junior@iqb.ufal.br).

## Supplementary Material

### Summary

|                                                                                                        |    |
|--------------------------------------------------------------------------------------------------------|----|
| Figure 1S. <sup>1</sup> H NMR (δ, CD <sub>3</sub> OD- <i>d</i> 4, 400 MHz) of <b>GIQ</b> . .....       | 2  |
| Figure 2S. <sup>13</sup> C NMR (δ, CH <sub>3</sub> OD- <i>d</i> 4, 100 MHz) of <b>GIQ</b> . .....      | 3  |
| Figure 3S. FTIR of compound <b>GIQ</b> . .....                                                         | 3  |
| Figure 4S. <sup>1</sup> H NMR (δ, DMSO- <i>d</i> 6, 600 MHz) and expansion of <b>TOQ</b> . .....       | 4  |
| Figure 5S. <sup>13</sup> C NMR (δ, DMSO- <i>d</i> 6, 100 MHz) of <b>TOQ</b> . .....                    | 5  |
| Figure 6S. FTIR of <b>TOQ</b> . .....                                                                  | 5  |
| Figure 7S. <sup>1</sup> H NMR (δ, DMSO- <i>d</i> 6, 600 MHz) and expansion of <b>DEQ</b> . .....       | 6  |
| Figure 8S. <sup>13</sup> C NMR (δ, DMSO- <i>d</i> 6, 100 MHz) and expansion of <b>DEQ</b> . .....      | 7  |
| Figure 9S. FTIR of <b>DEQ</b> . .....                                                                  | 9  |
| Figure 10S. <sup>1</sup> H NMR (δ, CD <sub>3</sub> OD- <i>d</i> 4, 400 MHz) of <b>CEQ</b> . .....      | 10 |
| Figure 11S. <sup>13</sup> C NMR (δ, CD <sub>3</sub> OD- <i>d</i> 4, 100 MHz) of <b>CEQ</b> . .....     | 11 |
| Figure 12S. FTIR of <b>CEQ</b> . .....                                                                 | 11 |
| Figure 13S. <sup>1</sup> H NMR (δ, CDCl <sub>3</sub> , 400 MHz) and expansion of <b>IBUCEQ</b> . ..... | 12 |
| Figure 14S. <sup>13</sup> C NMR (δ, CDCl <sub>3</sub> , 100 MHz) of <b>IBUCEQ</b> . .....              | 13 |
| Figure 15S. FTIR of <b>IBUCEQ</b> . .....                                                              | 14 |

# GIQ

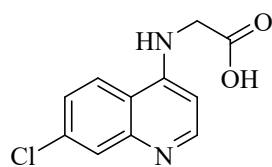

Chemical Formula: C<sub>11</sub>H<sub>9</sub>ClN<sub>2</sub>O<sub>2</sub>

Exact Mass: 236,04

Figure 1S. <sup>1</sup>H NMR (δ, CD<sub>3</sub>OD-*d*<sub>4</sub>, 400 MHz) of **GIQ**.

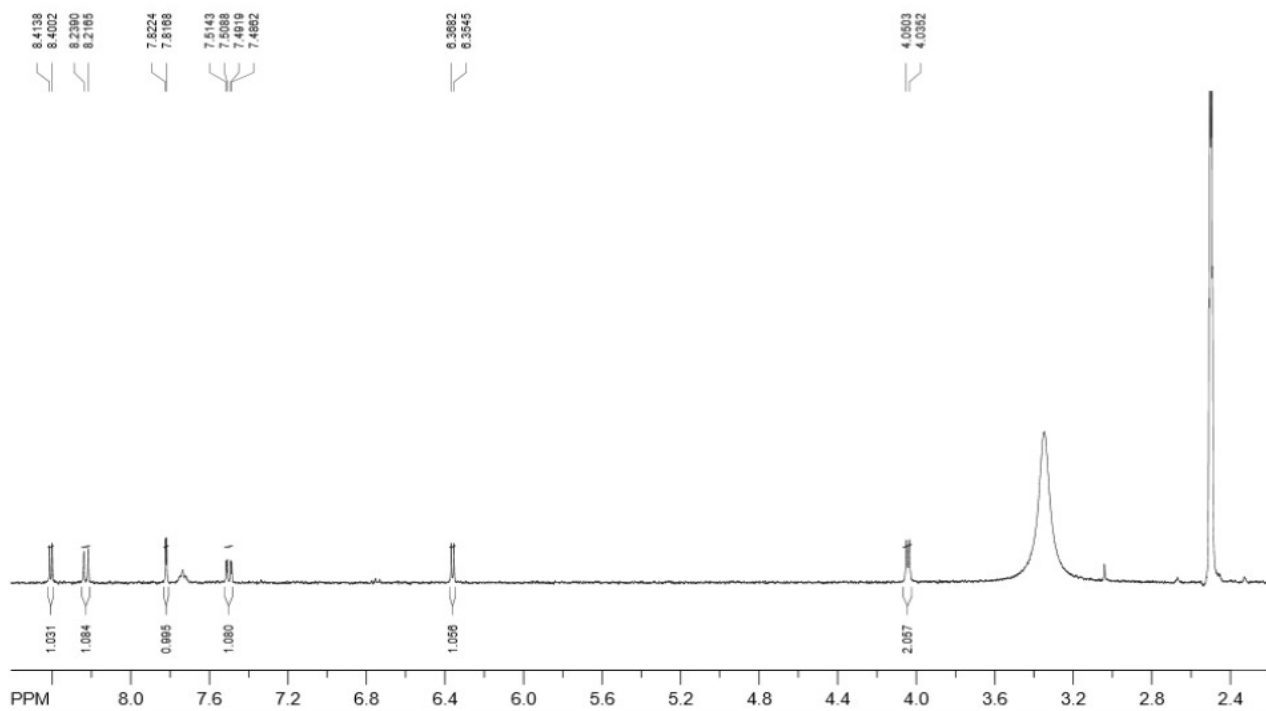

Figure 2S.  $^{13}\text{C}$  NMR ( $\delta$ ,  $\text{CH}_3\text{OD}-d_4$ , 100 MHz) of **GIQ**.

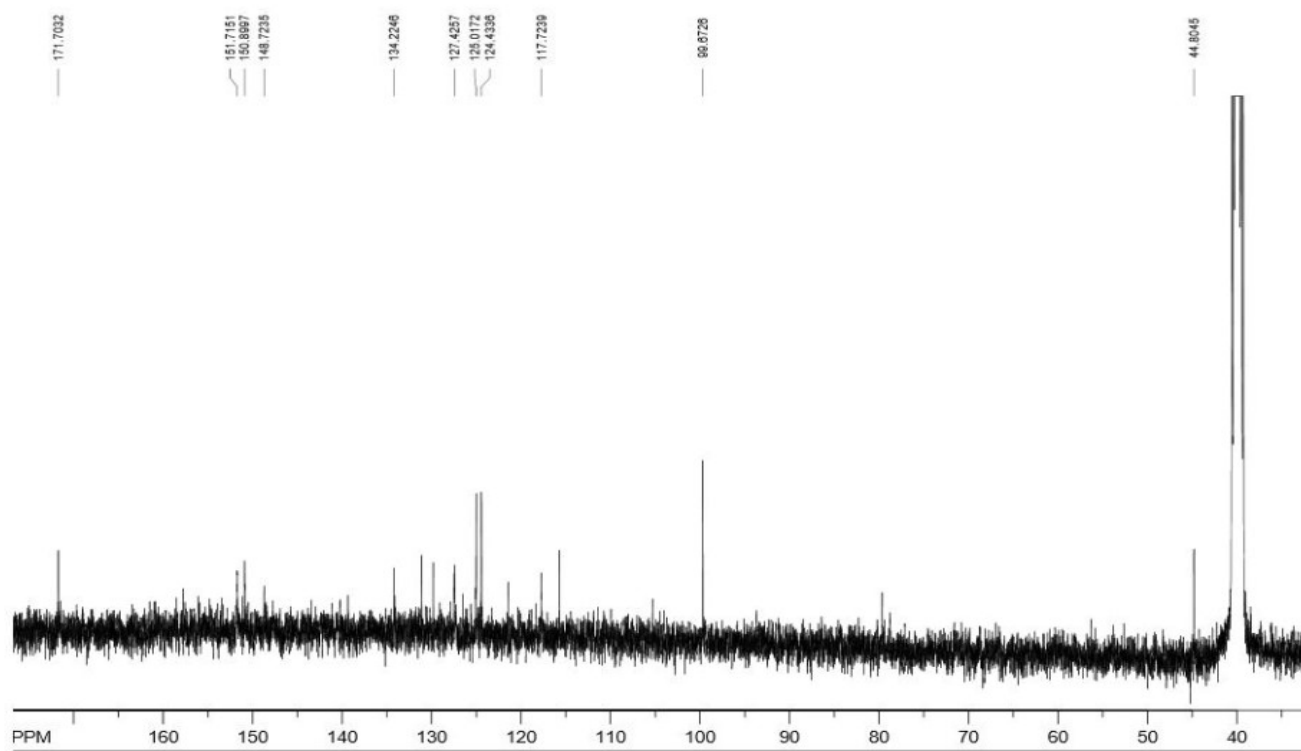

Figure 3S. FTIR of compound **GIQ**.

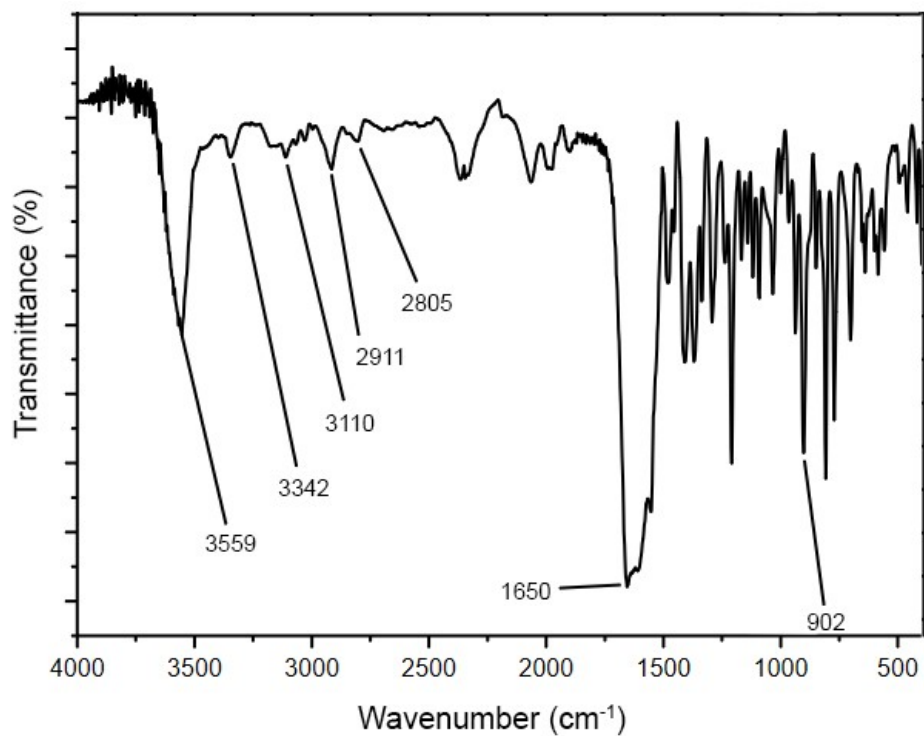

### TOQ

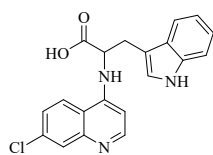

Chemical Formula:  $C_{20}H_{16}ClN_3O_2$   
Exact Mass: 365,09

Figure 4S.  $^1H$  NMR ( $\delta$ , DMSO- $d_6$ , 600 MHz) and expansion of TOQ.

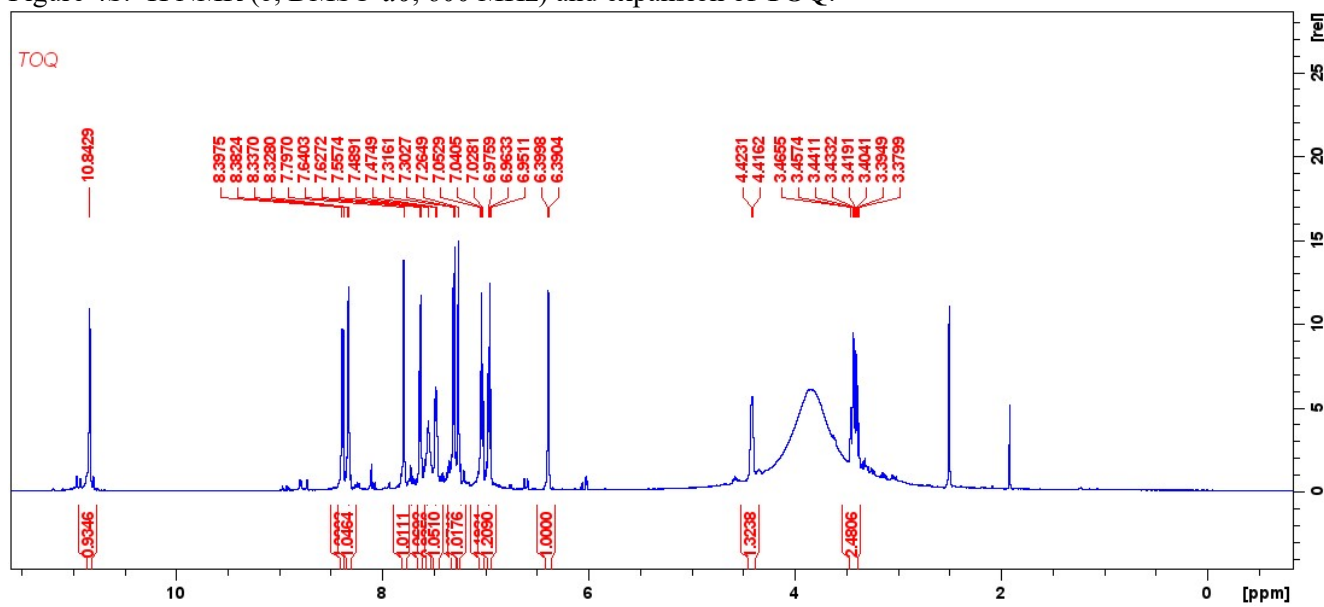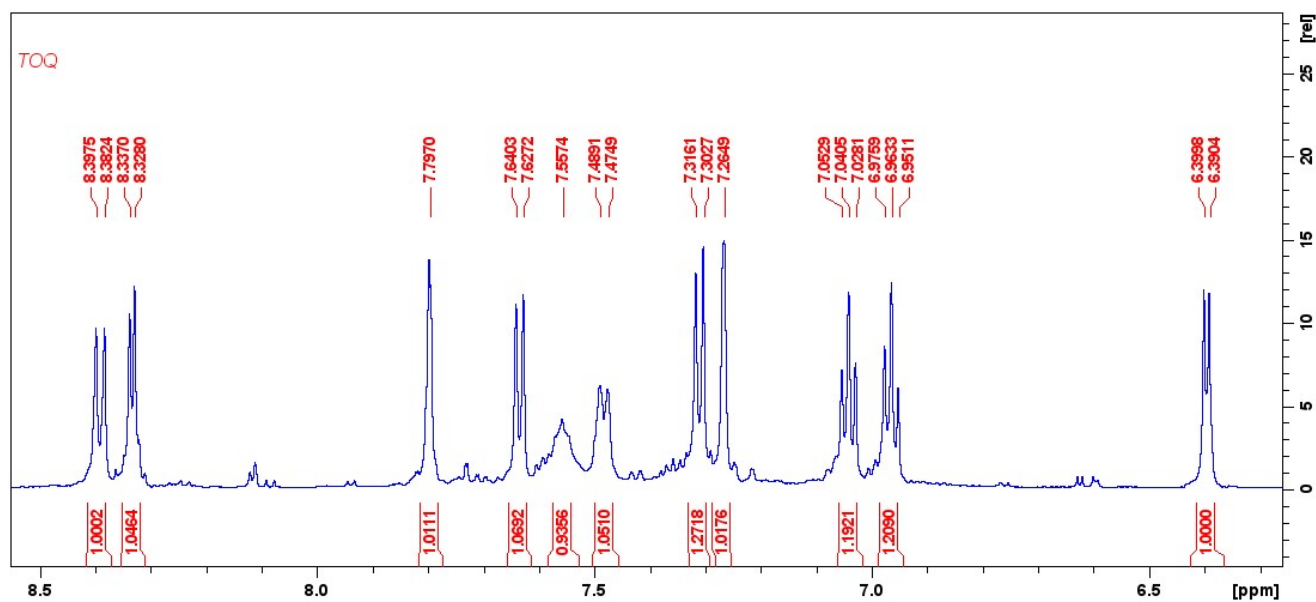

Figure 5S.  $^{13}\text{C}$  NMR ( $\delta$ , DMSO- $d_6$ , 100 MHz) of TOQ.

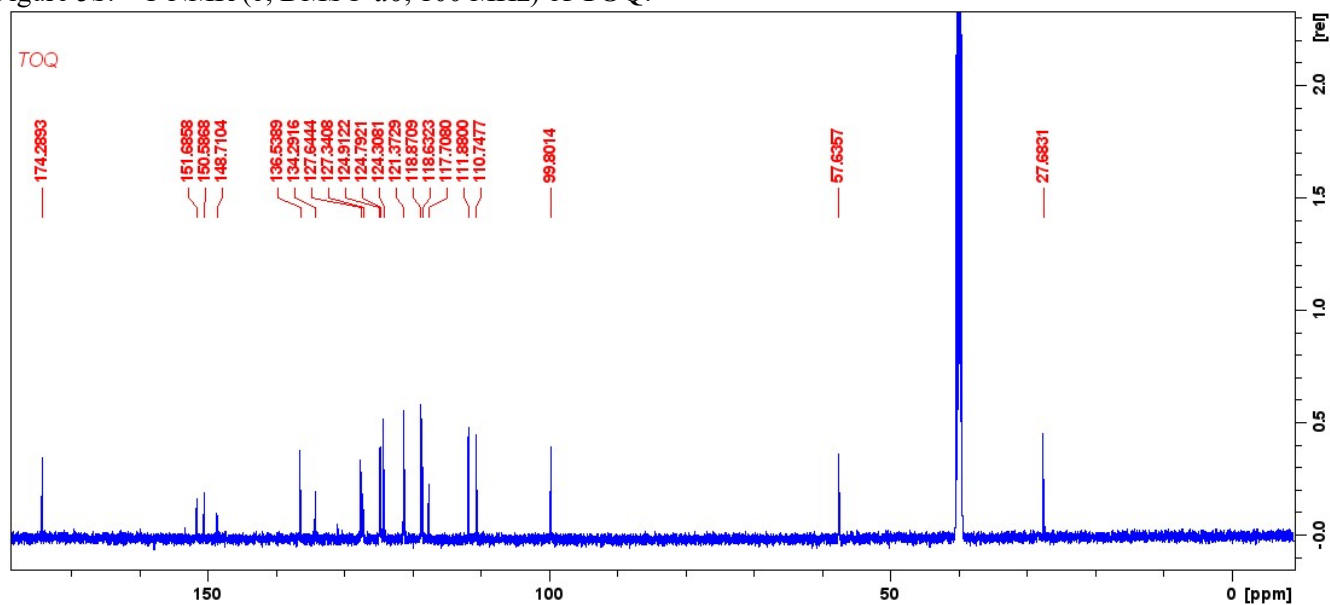

Figure 6S. FTIR of TOQ.

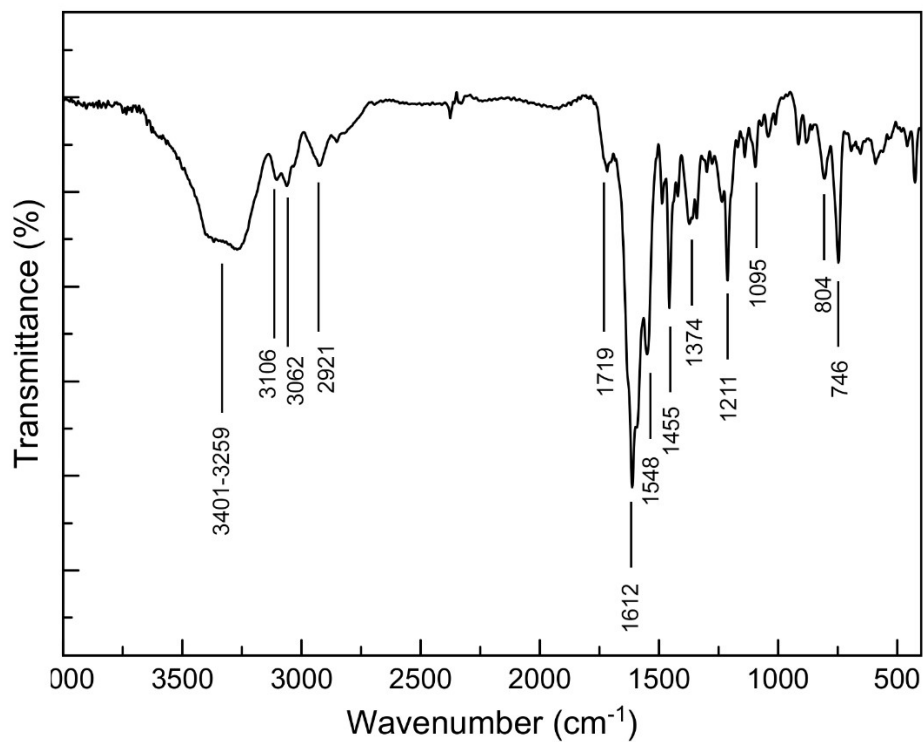

# DEQ

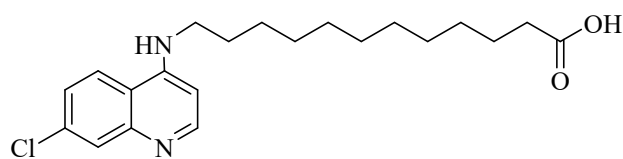

Chemical Formula: C<sub>21</sub>H<sub>29</sub>ClN<sub>2</sub>O<sub>2</sub>

Exact Mass: 376,19

Figure 7S. <sup>1</sup>H NMR (δ, DMSO-*d*<sub>6</sub>, 600 MHz) and expansion of **DEQ**.

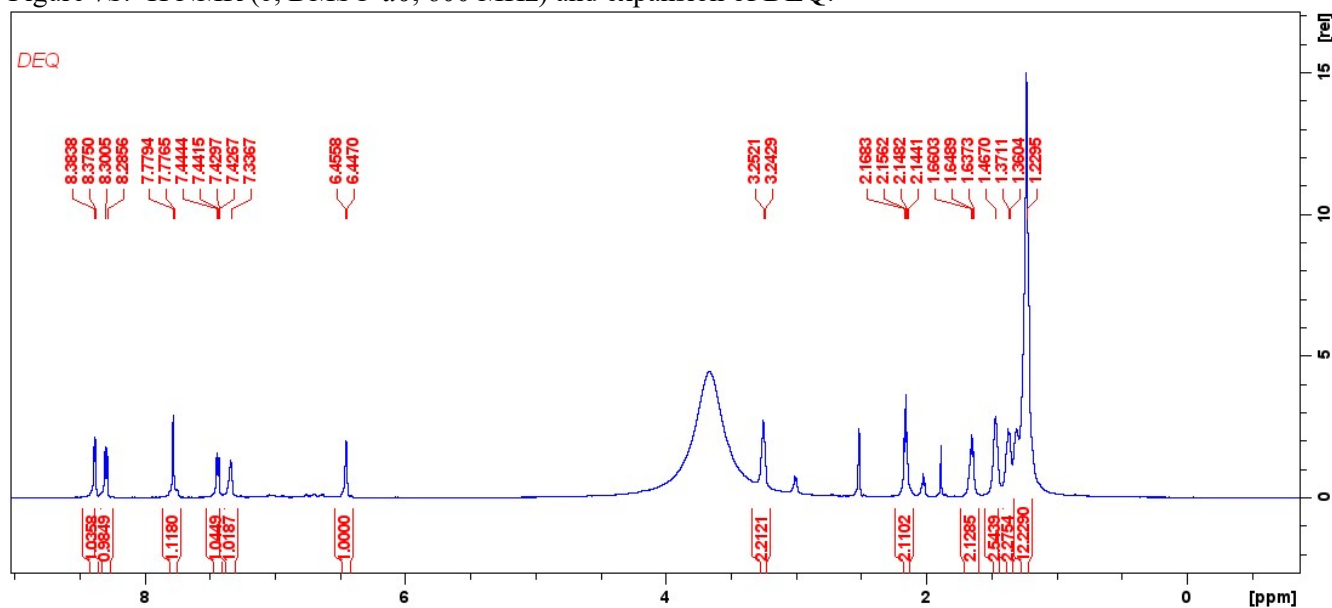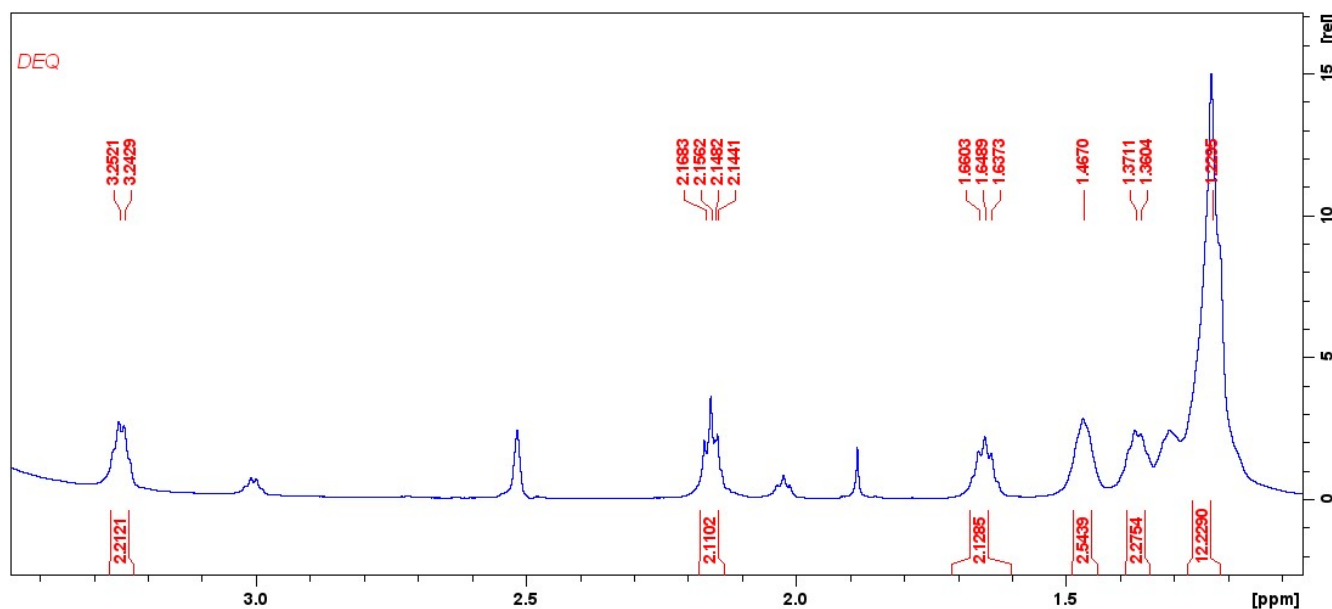

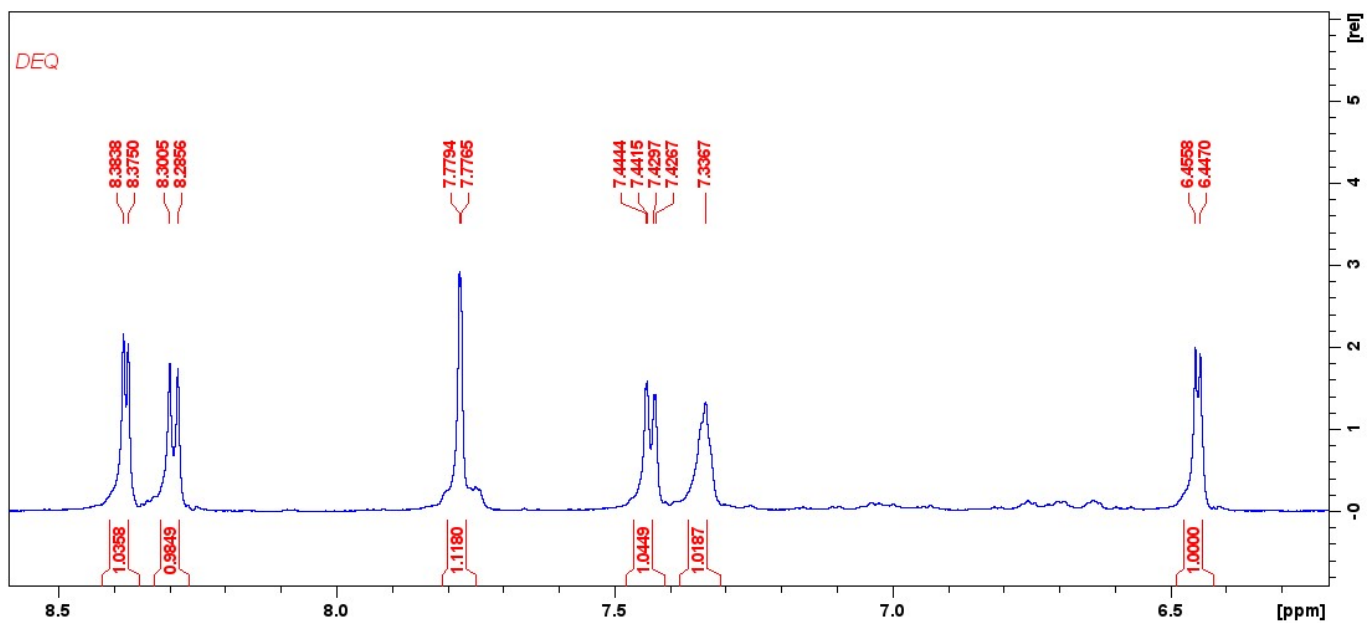

Figure 8S.  $^{13}\text{C}$  NMR ( $\delta$ ,  $\text{DMSO-}d_6$ , 100 MHz) and expansion of DEQ.

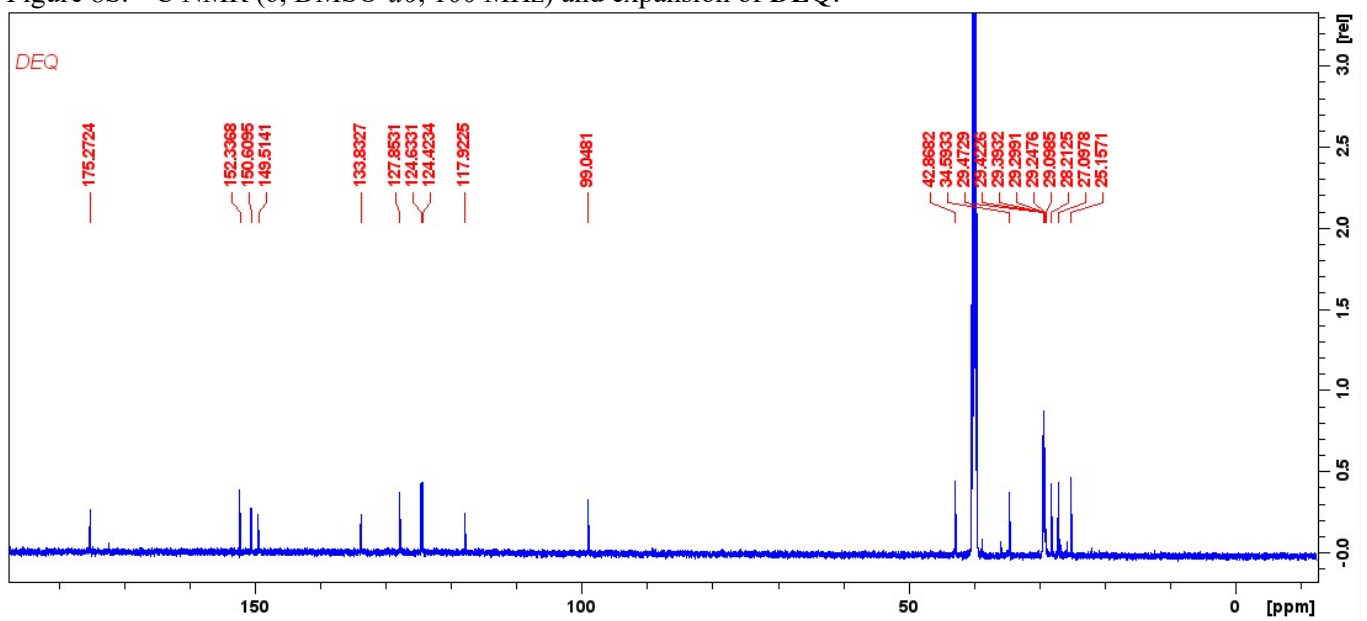

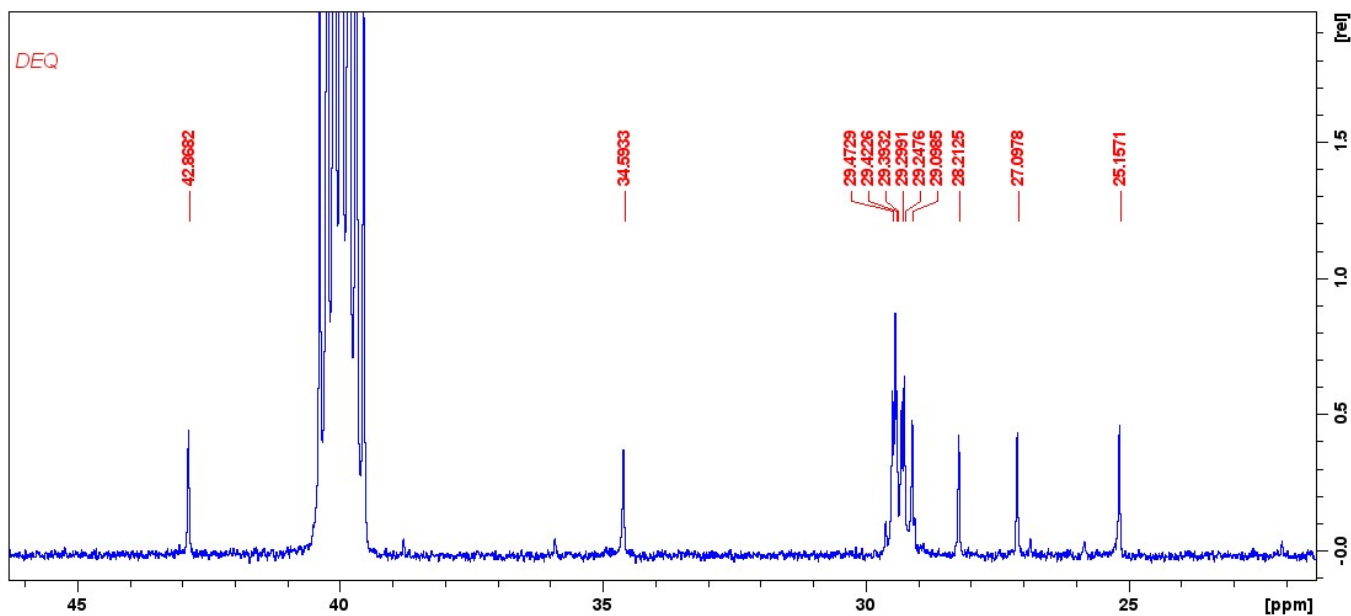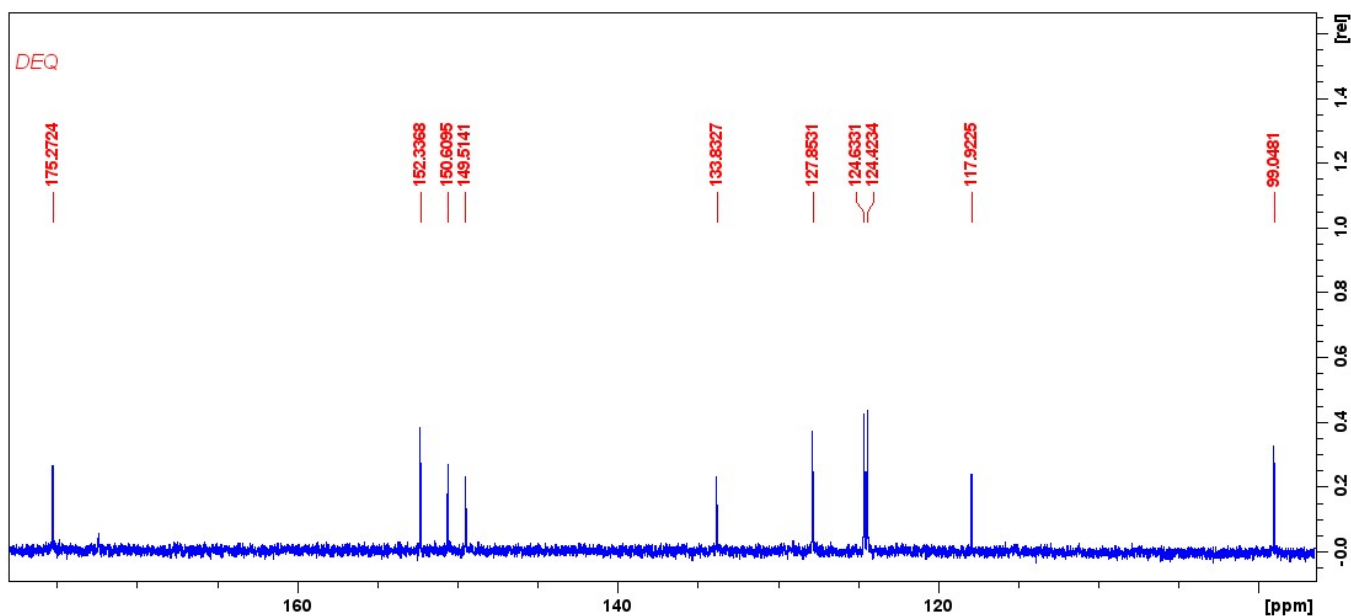



Figure 9S. FTIR of **DEQ**.

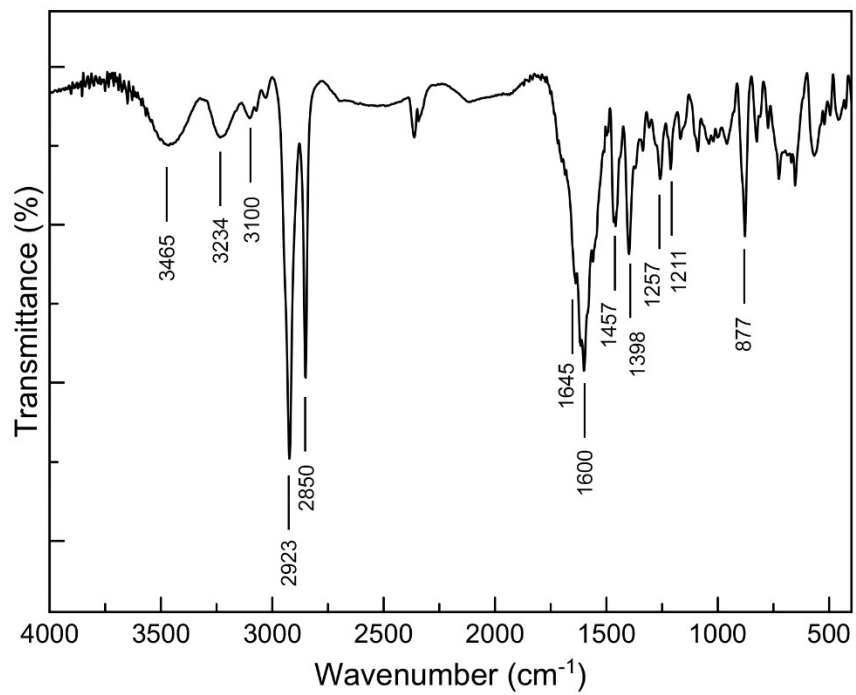

### CEQ

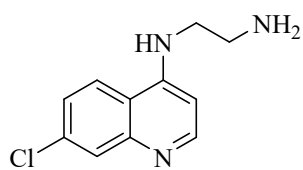

Chemical Formula: C<sub>11</sub>H<sub>12</sub>ClN<sub>3</sub>

Exact Mass: 221,07

Figure 10S. <sup>1</sup>H NMR (δ, CD<sub>3</sub>OD-*d*4, 400 MHz) of CEQ.

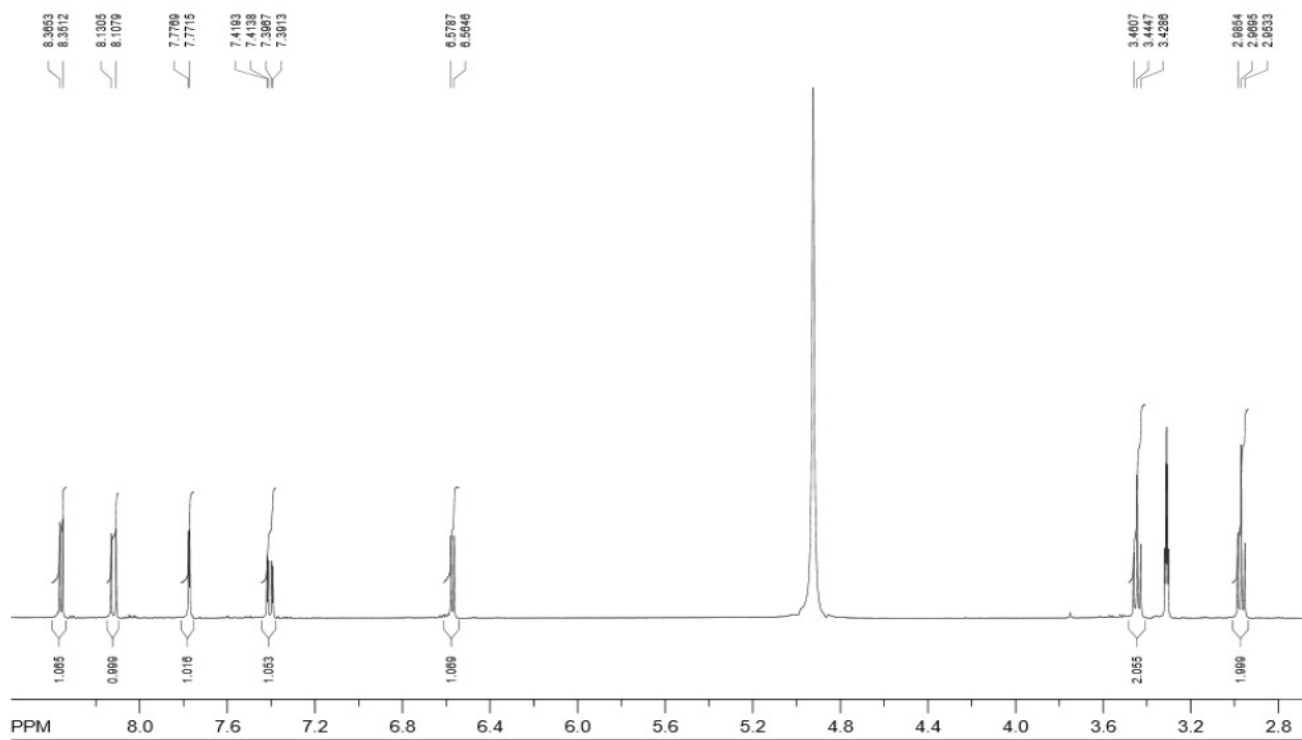

Figure 11S.  $^{13}\text{C}$  NMR ( $\delta$ ,  $\text{CD}_3\text{OD}-d_4$ , 100 MHz) of CEQ.

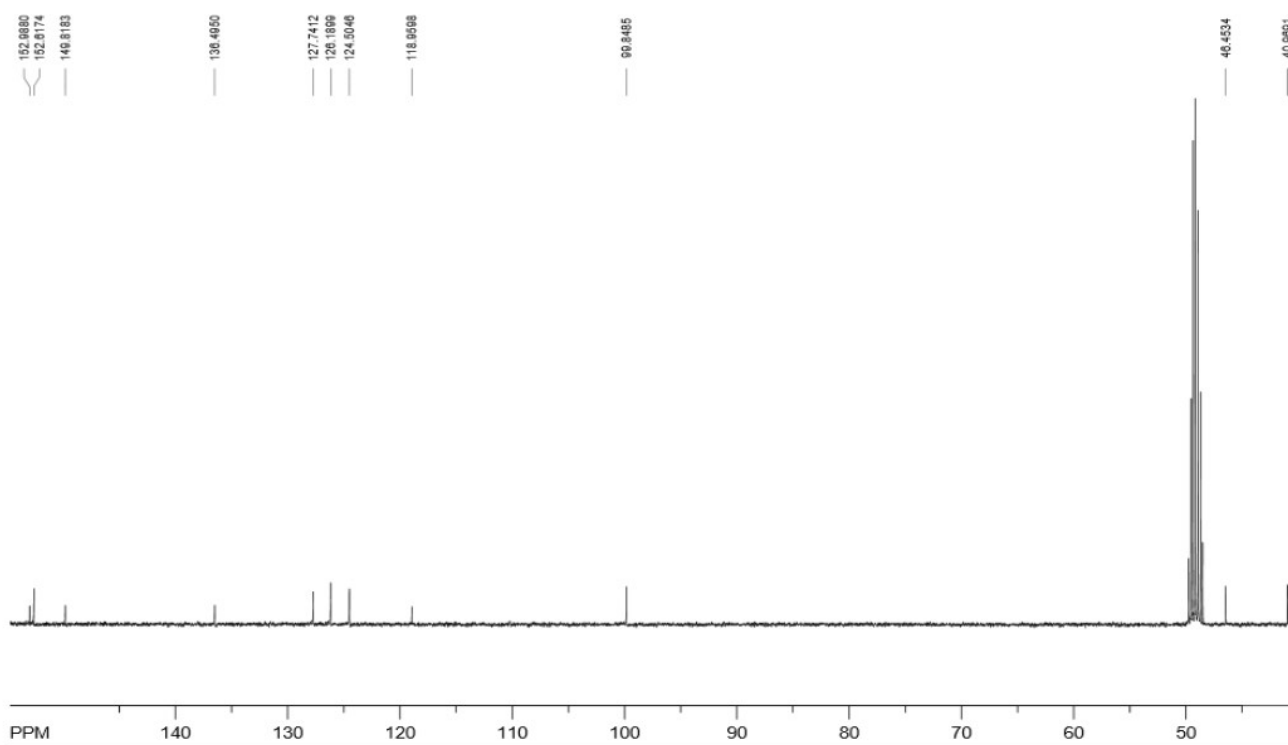

Figure 12S. FTIR of CEQ.

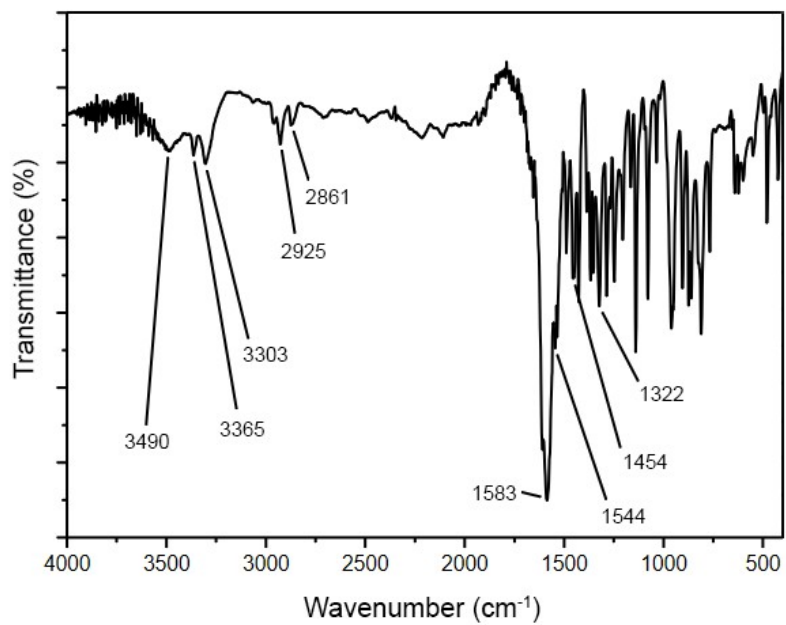

# IBUCEQ

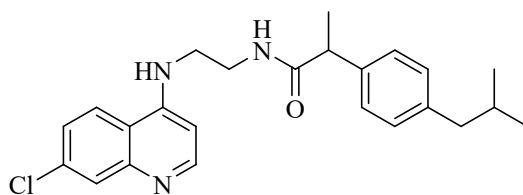

Chemical Formula: C<sub>24</sub>H<sub>28</sub>ClN<sub>3</sub>O

Exact Mass: 409,19

Figure 13S. <sup>1</sup>H NMR (δ, CDCl<sub>3</sub>, 400 MHz) and expansion of IBUCEQ.

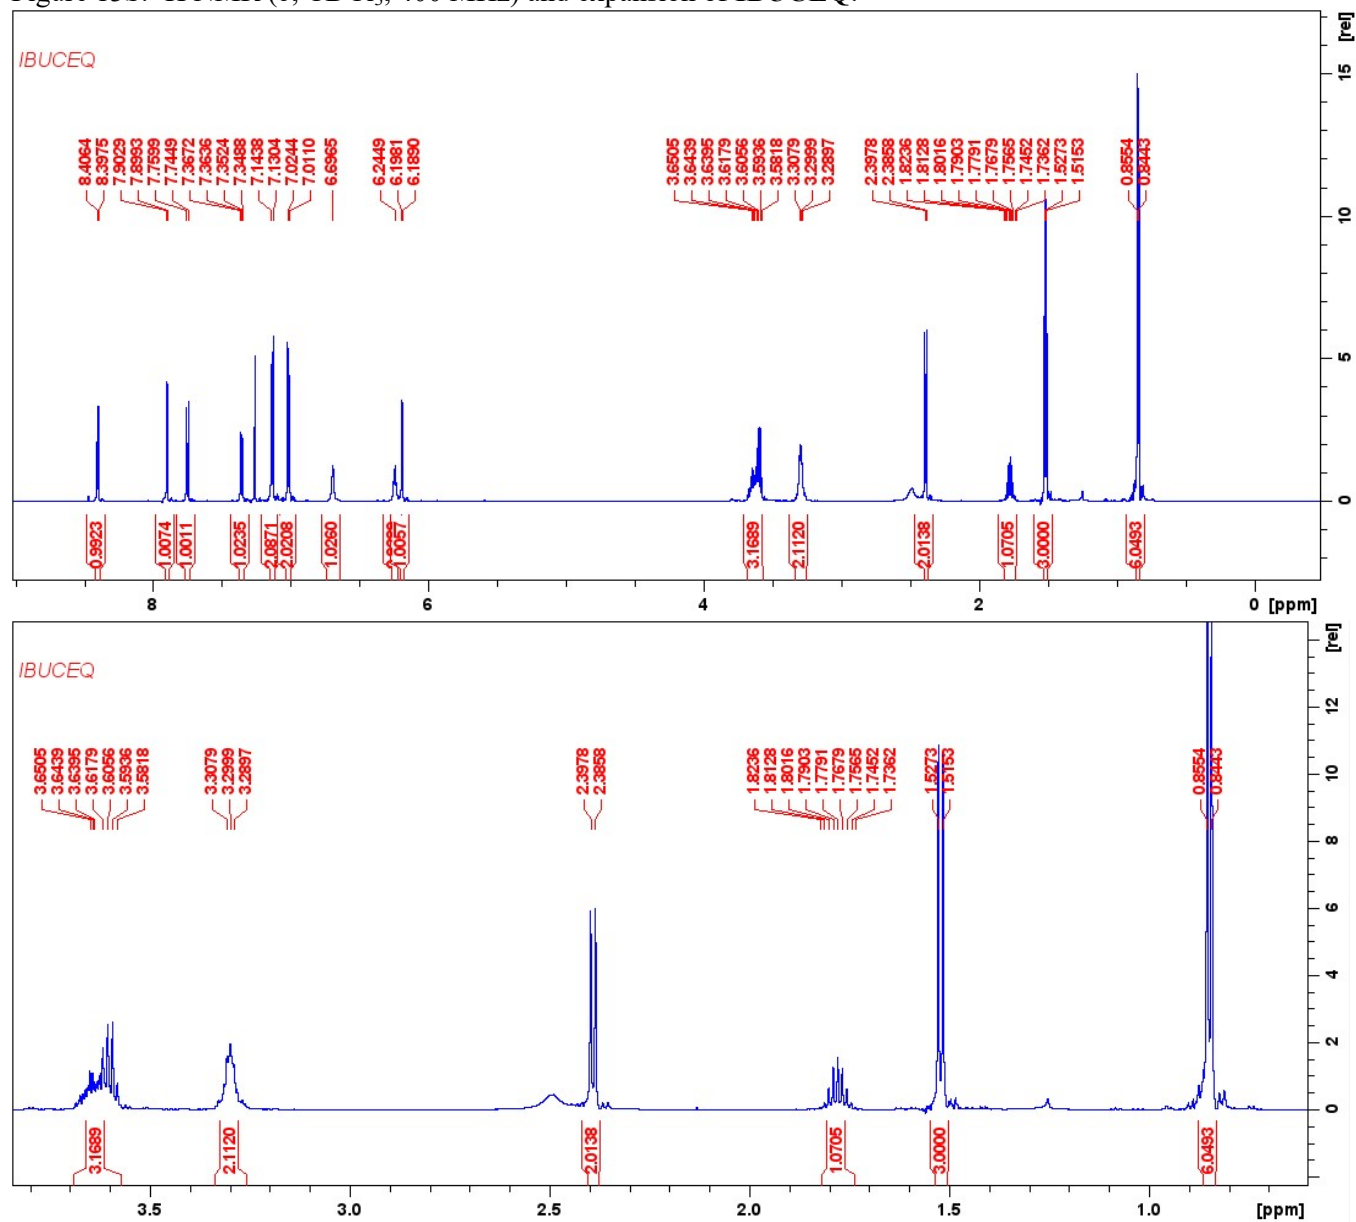

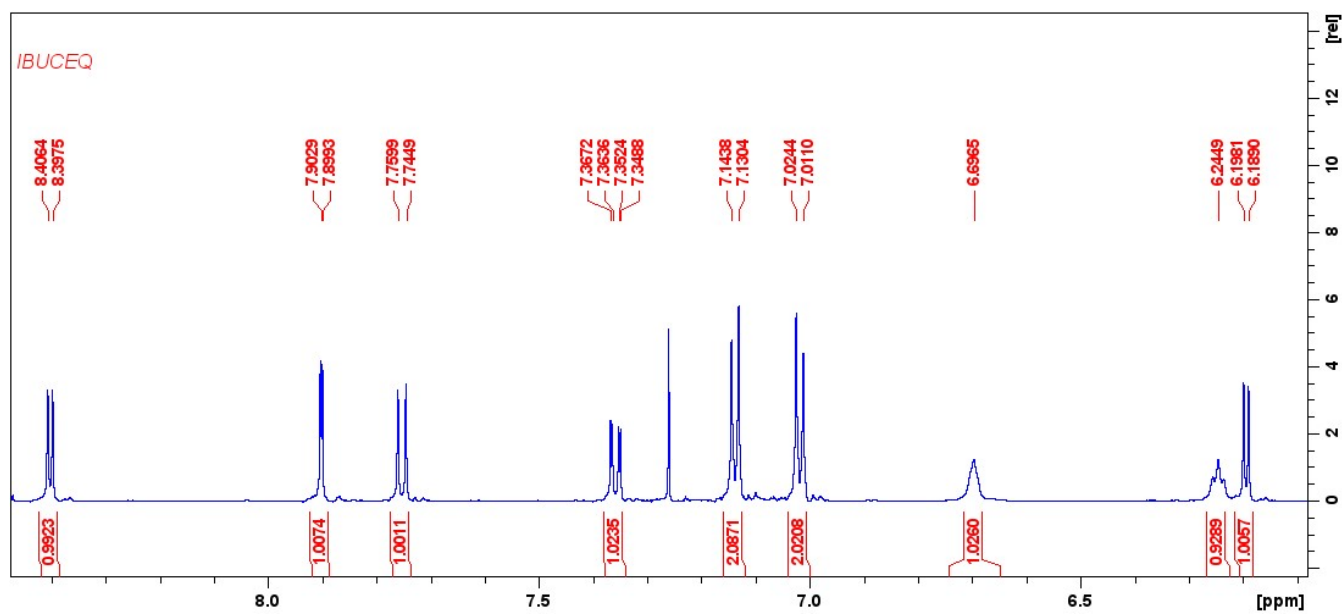

Figure 14S.  $^{13}\text{C}$  NMR ( $\delta$ ,  $\text{CDCl}_3$ , 100 MHz) of **IBUCEQ**.

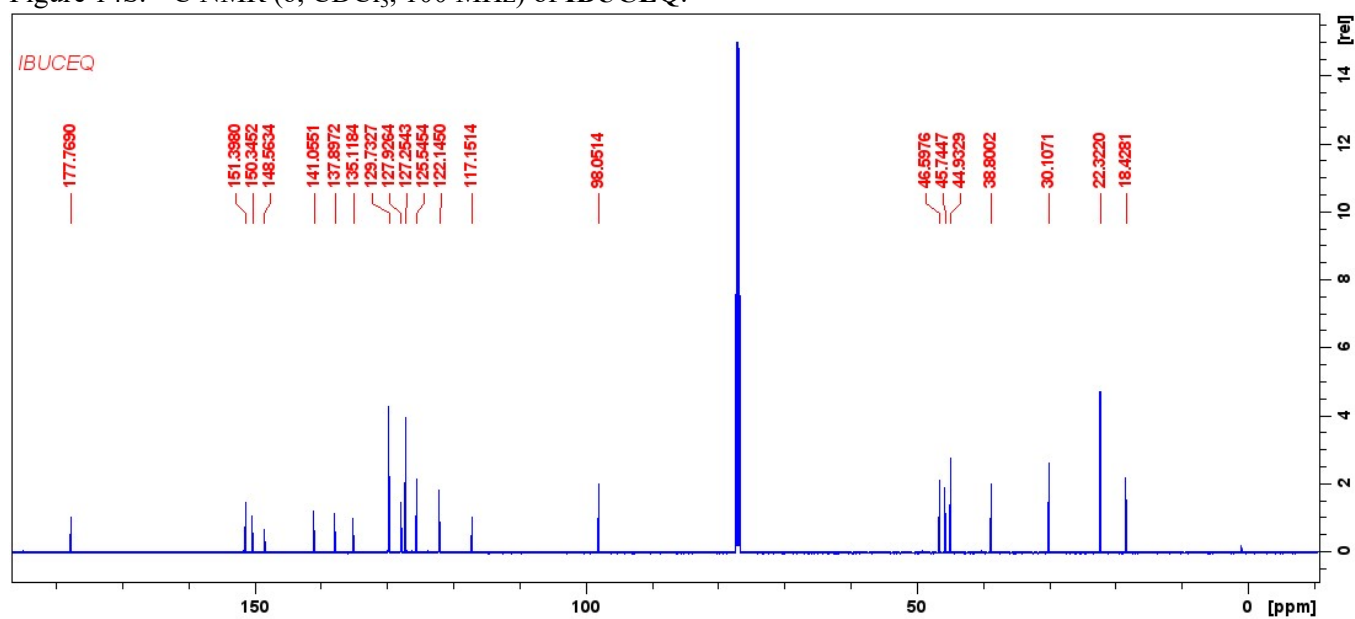

Figure 15S. FTIR of **IBUCEQ**.

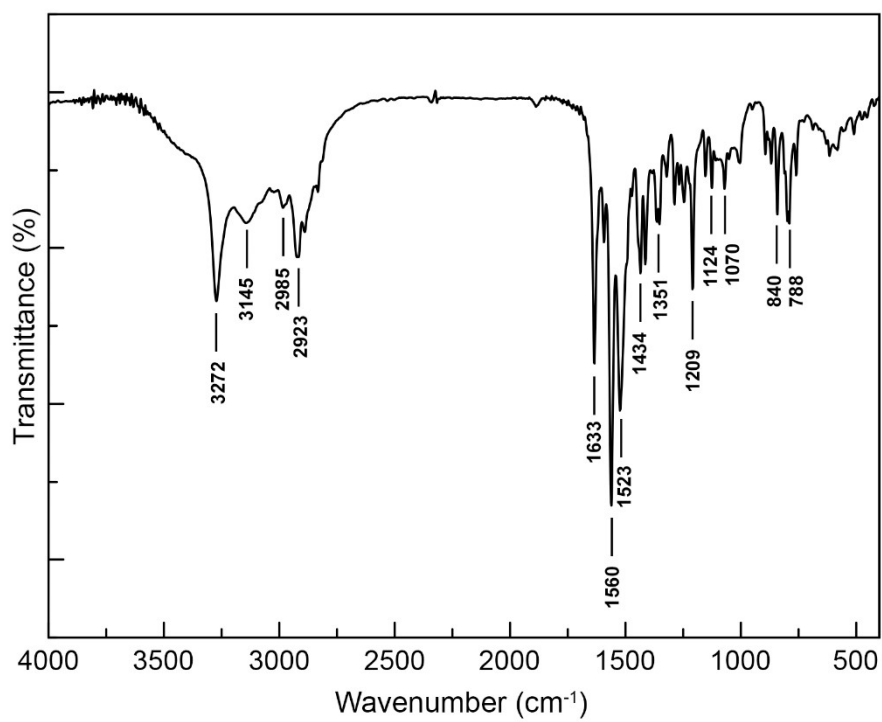

Supplement: d1nj05598d1.pdf [file d1nj05598d1.pdf]
